# Supplementary material
Source: MDPI journal article supplement (https://www.mdpi.com/2073-4395/12/2/428)
Supplement: s1 [file s1]

**Table S1.** Chemical and physical properties of potting soil used in the current study.

| Properties | Feature       | Units      | Value   |
|------------|---------------|------------|---------|
| Chemical   | Element       |            |         |
|            | P             | mg/kg      | 209.7   |
|            | K             | mg/kg      | 4210    |
|            | Ca            | mg/kg      | 5420    |
|            | Mg            | mg/kg      | 1630    |
|            | Na            | mg/kg      | 1120    |
|            | pH            |            | 6.05    |
|            | Total acid    | cmol(+)/kg | 0       |
| Physical   | Total cations | cmol(+)/kg | 56.1005 |
|            | Clay content  | %          | 12      |
